# Supplementary material
Source: PubMed Central journal article supplement (PMC10868642)
Supplement: NIHMS1957566-supplement-1.pdf [file NIHMS1957566-supplement-1.pdf]

Supplemental Table 1 Baseline Characteristics of Unmatched Population

| Characteristic  | Treatment Start 0-13 d |                  |         | Treatment Start 0-6 d |                |         |
|-----------------|------------------------|------------------|---------|-----------------------|----------------|---------|
|                 | 0-6 d                  | 7-13 d           | P Value | 0-3 d                 | 4-6 d          | P Value |
| Patients, n     | 9688                   | 1431             |         | 8296                  | 1392           |         |
| Age, y          |                        |                  |         |                       |                |         |
| Mean            | 65.6 ± 9.9             | 65.6 ± 9.9       | .74     | 65.7 ± 9.9            | 65.3 ± 10      | .78     |
| Median (range)  | 66 (19-90)             | 66 (32-90)       | .62     | 66 (19-90)            | 66 (32-90)     | .66     |
| RT duration, d  |                        |                  |         |                       |                |         |
| Mean            | 52.1 ± 5.1             | 52.4 ± 5.1       | .012    | 64.7 ± 3.6            | 65.0 ± 3.7     | .27     |
| Median (range)  | 52 (42-64)             | 52 (42-64)       | .015    | 64.8 (59.4-74)        | 65.0 (59.4-74) | .26     |
| RT dose, Gy     |                        |                  |         |                       |                |         |
| Mean            | 64.9 ± 3.6             | 64.8 ± 3.6       | .14     | 52 ± 5.0              | 52.6 ± 5.2     | .53     |
| Median (range)  | 64.8 (59.4-74.0)       | 64.8 (59.4-74.0) | .15     | 51 (42-64)            | 52 (42-64)     | .40     |
| Race            |                        |                  | .02     |                       |                | .78     |
| White           | 8477 (87.5)            | 1221 (85.3)      |         | 7276 (87.7)           | 1201 (86.3)    |         |
| Nonwhite        | 1211 (12.5)            | 210 (14.7)       |         | 1020 (12.3)           | 191 (13.7)     |         |
| Gender          |                        |                  | .76     |                       |                | .60     |
| Female          | 3878 (40)              | 579 (40.5)       |         | 3358 (40.5)           | 520 (37.4)     |         |
| Male            | 5810 (60)              | 852 (59.5)       |         | 4938 (59.5)           | 872 (62.6)     |         |
| Stage           |                        |                  | .40     |                       |                | .98     |
| II              | 21 (0.2)               | 1 (0.1)          |         | 18 (0.2)              | 3 (0.2)        |         |
| IIA             | 190 (2)                | 22 (1.5)         |         | 164 (2)               | 26 (1.9)       |         |
| IIB             | 734 (7.6)              | 97 (6.8)         |         | 640 (7.7)             | 94 (6.8)       |         |
| III             | 72 (0.7)               | 7 (0.5)          |         | 57 (0.7)              | 15 (1.1)       |         |
| IIIA            | 4694 (48.5)            | 703 (49.1)       |         | 4046 (48.8)           | 648 (46.6)     |         |
| IIIB            | 3977 (41.1)            | 601 (42)         |         | 3371 (40.6)           | 606 (43.5)     |         |
| CD score        |                        |                  | .12     |                       |                | .98     |
| 0               | 6260 (64.6)            | 888 (62)         |         | 5369 (64.7)           | 891 (64)       |         |
| 1               | 2506 (22.9)            | 406 (28.4)       |         | 2159 (26)             | 347 (24.9)     |         |
| ≥2              | 922 (9.5)              | 137 (9.6)        |         | 768 (9.3)             | 154 (11.1)     |         |
| Insurance       |                        |                  | .99     |                       |                | .90     |
| Private         | 3113 (32.1)            | 463 (32.4)       |         | 2673 (32.3)           | 440 (31.6)     |         |
| None            | 332 (3.4)              | 50 (3.5)         |         | 268 (3.2)             | 64 (4.6)       |         |
| Government      | 6138 (63.4)            | 903 (63.1)       |         | 5261 (63.4)           | 877 (63)       |         |
| Unknown         | 105 (1.1)              | 15 (1.1)         |         | 94 (1.2)              | 11 (0.8)       |         |
| Histologic type |                        |                  | .18     |                       |                | .99     |
| Adenocarcinoma  | 2815 (29.1)            | 386 (27)         |         | 2465 (29.7)           | 350 (25.1)     |         |
| SCC             | 4202 (43.4)            | 618 (43.2)       |         | 3557 (42.9)           | 645 (46.3)     |         |
| Bronchoalveolar | 49 (0.5)               | 5 (0.4)          |         | 42 (0.5)              | 7 (0.5)        |         |
| Large cell      | 303 (3.1)              | 56 (3.9)         |         | 265 (3.2)             | 38 (2.7)       |         |
| Other           | 2319 (23.9)            | 366 (25.6)       |         | 1967 (23.7)           | 352 (25.3)     |         |
| Income          |                        |                  | .0001   |                       |                | .78     |
| >\$35,000       | 5876 (60.6)            | 792 (55.4)       |         | 5073 (61.2)           | 803 (57.7)     |         |
| ≤\$35,000       | 3812 (39.4)            | 639 (44.6)       |         | 3223 (38.8)           | 589 (42.3)     |         |
| Area            |                        |                  | .43     |                       |                | .24     |
| Urban           | 9387 (96.9)            | 1392 (97.3)      |         | 8041 (96.9)           | 1346 (96.7)    |         |
| Rural           | 301 (3.1)              | 39 (2.7)         |         | 255 (3.1)             | 46 (3.3)       |         |
| Distance, miles |                        |                  | .078    |                       |                | .051    |
| 0-49.9          | 9070 (93.6)            | 1357 (94.8)      |         | 7751 (93.4)           | 1319 (94.8)    |         |
| ≥50             | 618 (6.4)              | 74 (5.2)         |         | 545 (6.6)             | 73 (5.2)       |         |

# Asynchronous Chemoradiation and Lung Cancer

**Supplemental Table 1** Continued

| Characteristic | Treatment Start 0-13 d |             |         | Treatment Start 0-6 d |            |         |
|----------------|------------------------|-------------|---------|-----------------------|------------|---------|
|                | 0-6 d                  | 7-13 d      | P Value | 0-3 d                 | 4-6 d      | P Value |
| Facility type  |                        |             | .20     |                       |            | .77     |
| Academic       | 1872 (19.3)            | 256 (17.9)  |         | 1607 (19.4)           | 256 (19)   |         |
| Other          | 7816 (80.7)            | 1175 (82.1) |         | 6689 (80.6)           | 1127 (81)  |         |
| Location       |                        |             | <.0001  |                       |            | .99     |
| Northeast      | 1735 (18)              | 256 (18)    |         | 1475 (17.9)           | 260 (18.7) |         |
| Central        | 3565 (37)              | 447 (31.3)  |         | 3108 (37.7)           | 457 (32.9) |         |
| South          | 3360 (34.8)            | 591 (41.4)  |         | 2815 (34.1)           | 545 (39.3) |         |
| West           | 982 (10.2)             | 132 (9.3)   |         | 856 (10.4)            | 126 (9.1)  |         |

Data presented as n (%), unless noted otherwise.

Abbreviations: CD = Charlson/Deyo (comorbidity); RT = radiation therapy; SCC = squamous cell carcinoma.
